# Supplementary material
Source: PubMed Central journal article supplement (PMC1567908)
Supplement: pnas_0605207103_4.pdf [file pnas_0605207103_4.pdf]

**Table 2. ANOVA statistical analysis of ornithine decarboxylase 1 (ODC1) in human cancers**

| Tukey's Multiple Comparison Test                            | Mean Difference | q        | P value   | 95% CI of difference |
|-------------------------------------------------------------|-----------------|----------|-----------|----------------------|
| Pheochromocytoma vs NED Lung Adenocarcinoma                 | -22860          | 8.335    | P < 0.001 | -36770 to -8946      |
| Medullary Thyroid Carcinoma vs NED Lung Adenocarcinoma      | -20900          | 6.668    | P < 0.001 | -36810 to -4999      |
| Breast Adenocarcinoma vs Prostate Adenocarcinoma            | -12560          | 6.774    | P < 0.001 | -21970 to -3155      |
| Breast Adenocarcinoma vs NED Lung Adenocarcinoma            | -24230          | 8.835    | P < 0.001 | -38140 to -10320     |
| Colon Carcinoma vs NED Lung Adenocarcinoma                  | -19900          | 7.323    | P < 0.001 | -33690 to -6116      |
| Renal Cell Carcinoma vs NED Lung Adenocarcinoma             | -22850          | 7.288    | P < 0.001 | -38760 to -6945      |
| Ovarian Carcinoma vs NED Lung Adenocarcinoma                | -19630          | 6.644    | P < 0.001 | -34620 to -4642      |
| Pancreatic Adenocarcinoma vs NED Lung Adenocarcinoma        | -24520          | 6.865    | P < 0.001 | -42640 to -6400      |
| Lung Carcinoid vs NED Lung Adenocarcinoma                   | -22100          | 8.323    | P < 0.001 | -35570 to -8630      |
| Lung Adenocarcinoma vs NED Lung Adenocarcinoma              | -16660          | 7.311    | P < 0.001 | -28220 to -5099      |
| NED Lung Adenocarcinoma vs Anaplastic Oligodendroglioma     | 18550           | 6.884    | P < 0.001 | 4880 to 32230        |
| Pheochromocytoma vs Prostate Adenocarcinoma                 | -11190          | 6.035    | P < 0.01  | -20600 to -1784      |
| Breast Adenocarcinoma vs Prostate Adeno Metastases          | -17700          | 5.871    | P < 0.01  | -32990 to -2405      |
| Hepatocellular Carcinoma vs NED Lung Adenocarcinoma         | -22400          | 6.533    | P < 0.01  | -39790 to -5005      |
| Prostate Adenocarcinoma vs Lung Carcinoid                   | 10440           | 6.055    | P < 0.01  | 1693 to 19180        |
| Nonmalignant Lung Tumor vs NED Lung Adenocarcinoma          | -21210          | 5.938    | P < 0.01  | -39330 to -3088      |
| Pheochromocytoma vs Prostate Adeno Metastases               | -16330          | 5.416    | P < 0.05  | -31620 to -1034      |
| Breast Adenocarcinoma vs Squamous Cell Lung Carcinoma       | -11270          | 5.433    | P < 0.05  | -21800 to -747.3     |
| Prostate Adeno Metastases vs Lung Carcinoid                 | 15570           | 5.304    | P < 0.05  | 677.1 to 30460       |
| NED Lung Adenocarcinoma vs Small Cell Lung Carcinoma        | 19640           | 5.729    | P < 0.05  | 2248 to 37030        |
| NED Lung Adenocarcinoma vs Squamous Cell Lung Carcinoma     | 12960           | 5.21     | P < 0.05  | 339.9 to 25570       |
| NED Lung Adenocarcinoma vs Glioblastoma Multiforme          | 14090           | 5.438    | P < 0.05  | 944.8 to 27240       |
| Pheochromocytoma vs Medullary Thyroid Carcinoma             | -1955           | 0.6935   | P > 0.05  | -16260 to 12350      |
| Pheochromocytoma vs Breast Adenocarcinoma                   | 1371            | 0.5773   | P > 0.05  | -10680 to 13420      |
| Pheochromocytoma vs Colon Carcinoma                         | -2955           | 1.259    | P > 0.05  | -14860 to 8950       |
| Pheochromocytoma vs Renal Cell Carcinoma                    | -9.635          | 0.003418 | P > 0.05  | -14310 to 14290      |
| Pheochromocytoma vs Hepatocellular Carcinoma                | -463.3          | 0.1474   | P > 0.05  | -16400 to 15480      |
| Pheochromocytoma vs Ovarian Carcinoma                       | -3227           | 1.233    | P > 0.05  | -16510 to 10050      |
| Pheochromocytoma vs Pancreatic Adenocarcinoma               | 1662            | 0.5038   | P > 0.05  | -15070 to 18400      |
| Pheochromocytoma vs Nonmalignant Lung Tumor                 | -1650           | 0.5002   | P > 0.05  | -18380 to 15080      |
| Pheochromocytoma vs Lung Carcinoid                          | -757.6          | 0.3332   | P > 0.05  | -12290 to 10780      |
| Pheochromocytoma vs Lung Adenocarcinoma                     | -6202           | 3.408    | P > 0.05  | -15430 to 3030       |
| Pheochromocytoma vs Large Cell Lung Carcinoma               | -15760          | 4.198    | P > 0.05  | -34820 to 3288       |
| Pheochromocytoma vs Small Cell Lung Carcinoma               | -3220           | 1.025    | P > 0.05  | -19160 to 12720      |
| Pheochromocytoma vs Squamous Cell Lung Carcinoma            | -9902           | 4.772    | P > 0.05  | -20430 to 623.8      |
| Pheochromocytoma vs Anaplastic Oligodendroglioma            | -4305           | 1.855    | P > 0.05  | -16080 to 7467       |
| Pheochromocytoma vs Glioblastoma Multiforme                 | -8768           | 3.987    | P > 0.05  | -19920 to 2388       |
| Medullary Thyroid Carcinoma vs Breast Adenocarcinoma        | 3326            | 1.18     | P > 0.05  | -10980 to 17630      |
| Medullary Thyroid Carcinoma vs Colon Carcinoma              | -999.3          | 0.3575   | P > 0.05  | -15180 to 13180      |
| Medullary Thyroid Carcinoma vs Renal Cell Carcinoma         | 1946            | 0.6075   | P > 0.05  | -14300 to 18190      |
| Medullary Thyroid Carcinoma vs Hepatocellular Carcinoma     | 1492            | 0.4275   | P > 0.05  | -16210 to 19200      |
| Medullary Thyroid Carcinoma vs Ovarian Carcinoma            | -1272           | 0.4203   | P > 0.05  | -16620 to 14080      |
| Medullary Thyroid Carcinoma vs Pancreatic Adenocarcinoma    | 3617            | 0.996    | P > 0.05  | -14810 to 22040      |
| Medullary Thyroid Carcinoma vs Prostate Adenocarcinoma      | -9238           | 3.853    | P > 0.05  | -21400 to 2925       |
| Medullary Thyroid Carcinoma vs Prostate Adeno Metastases    | -14370          | 4.257    | P > 0.05  | -31500 to 2753       |
| Medullary Thyroid Carcinoma vs Nonmalignant Lung Tumor      | 305.4           | 0.0841   | P > 0.05  | -18120 to 18730      |
| Medullary Thyroid Carcinoma vs Lung Carcinoid               | 1198            | 0.438    | P > 0.05  | -12680 to 15070      |
| Medullary Thyroid Carcinoma vs Lung Adenocarcinoma          | -4246           | 1.791    | P > 0.05  | -16270 to 7779       |
| Medullary Thyroid Carcinoma vs Large Cell Lung Carcinoma    | -13810          | 3.409    | P > 0.05  | -34360 to 6743       |
| Medullary Thyroid Carcinoma vs Small Cell Lung Carcinoma    | -1265           | 0.3624   | P > 0.05  | -18970 to 16440      |
| Medullary Thyroid Carcinoma vs Squamous Cell Lung Carcinoma | -7947           | 3.09     | P > 0.05  | -20990 to 5099       |
| Medullary Thyroid Carcinoma vs Anaplastic Oligodendroglioma | -2350           | 0.8472   | P > 0.05  | -16420 to 11720      |
| Medullary Thyroid Carcinoma vs Glioblastoma Multiforme      | -6812           | 2.549    | P > 0.05  | -20370 to 6746       |
| Breast Adenocarcinoma vs Colon Carcinoma                    | -4326           | 1.843    | P > 0.05  | -16230 to 7579       |
| Breast Adenocarcinoma vs Renal Cell Carcinoma               | -1381           | 0.4897   | P > 0.05  | -15680 to 12920      |
| Breast Adenocarcinoma vs Hepatocellular Carcinoma           | -1834           | 0.5838   | P > 0.05  | -17770 to 14110      |
| Breast Adenocarcinoma vs Ovarian Carcinoma                  | -4598           | 1.757    | P > 0.05  | -17880 to 8679       |
| Breast Adenocarcinoma vs Pancreatic Adenocarcinoma          | 290.6           | 0.08811  | P > 0.05  | -16440 to 17020      |
| Breast Adenocarcinoma vs Nonmalignant Lung Tumor            | -3021           | 0.9159   | P > 0.05  | -19750 to 13710      |
| Breast Adenocarcinoma vs Lung Carcinoid                     | -2129           | 0.9361   | P > 0.05  | -13670 to 9408       |
| Breast Adenocarcinoma vs Lung Adenocarcinoma                | -7573           | 4.162    | P > 0.05  | -16800 to 1659       |
| Breast Adenocarcinoma vs Large Cell Lung Carcinoma          | -17130          | 4.563    | P > 0.05  | -36190 to 1917       |
| Breast Adenocarcinoma vs Small Cell Lung Carcinoma          | -4591           | 1.461    | P > 0.05  | -20530 to 11350      |
| Breast Adenocarcinoma vs Anaplastic Oligodendroglioma       | -5676           | 2.446    | P > 0.05  | -17450 to 6096       |
| Breast Adenocarcinoma vs Glioblastoma Multiforme            | -10140          | 4.611    | P > 0.05  | -21290 to 1017       |
| Colon Carcinoma vs Renal Cell Carcinoma                     | 2945            | 1.054    | P > 0.05  | -11240 to 17130      |
| Colon Carcinoma vs Hepatocellular Carcinoma                 | 2491            | 0.7984   | P > 0.05  | -13340 to 18320      |
| Colon Carcinoma vs Ovarian Carcinoma                        | -272.7          | 0.1052   | P > 0.05  | -13420 to 12870      |
| Colon Carcinoma vs Pancreatic Adenocarcinoma                | 4616            | 1.408    | P > 0.05  | -12010 to 21250      |
| Colon Carcinoma vs Prostate Adenocarcinoma                  | -8239           | 4.531    | P > 0.05  | -17460 to 985.4      |
| Colon Carcinoma vs Prostate Adeno Metastases                | -13370          | 4.469    | P > 0.05  | -28550 to 1807       |
| Colon Carcinoma vs Nonmalignant Lung Tumor                  | 1305            | 0.398    | P > 0.05  | -15320 to 17930      |
| Colon Carcinoma vs Lung Carcinoid                           | 2197            | 0.979    | P > 0.05  | -9188 to 13580       |
| Colon Carcinoma vs Lung Adenocarcinoma                      | -3247           | 1.822    | P > 0.05  | -12290 to 5795       |
| Colon Carcinoma vs Large Cell Lung Carcinoma                | -12810          | 3.427    | P > 0.05  | -31770 to 6152       |
| Colon Carcinoma vs Small Cell Lung Carcinoma                | -265.4          | 0.08506  | P > 0.05  | -16100 to 15570      |
| Colon Carcinoma vs Squamous Cell Lung Carcinoma             | -6948           | 3.402    | P > 0.05  | -17310 to 3413       |
| Colon Carcinoma vs Anaplastic Oligodendroglioma             | -1350           | 0.5893   | P > 0.05  | -12980 to 10270      |
| Colon Carcinoma vs Glioblastoma Multiforme                  | -5813           | 2.681    | P > 0.05  | -16810 to 5186       |
| Renal Cell Carcinoma vs Hepatocellular Carcinoma            | -453.6          | 0.13     | P > 0.05  | -18160 to 17250      |
| Renal Cell Carcinoma vs Ovarian Carcinoma                   | -3218           | 1.063    | P > 0.05  | -18570 to 12130      |
| Renal Cell Carcinoma vs Pancreatic Adenocarcinoma           | 1671            | 0.4602   | P > 0.05  | -16750 to 20090      |
| Renal Cell Carcinoma vs Prostate Adenocarcinoma             | -11180          | 4.665    | P > 0.05  | -23350 to 979.0      |
| Renal Cell Carcinoma vs Prostate Adeno Metastases           | -16320          | 4.834    | P > 0.05  | -33440 to 807.7      |
| Renal Cell Carcinoma vs Nonmalignant Lung Tumor             | -1640           | 0.4517   | P > 0.05  | -20060 to 16780      |

|                                                              |        |         |          |                 |
|--------------------------------------------------------------|--------|---------|----------|-----------------|
| Renal Cell Carcinoma vs Lung Carcinoid                       | -748   | 0.2735  | P > 0.05 | -14620 to 13130 |
| Renal Cell Carcinoma vs Lung Adenocarcinoma                  | -6192  | 2.612   | P > 0.05 | -18220 to 5834  |
| Renal Cell Carcinoma vs Large Cell Lung Carcinoma            | -15750 | 3.889   | P > 0.05 | -36310 to 4797  |
| Renal Cell Carcinoma vs Small Cell Lung Carcinoma            | -3211  | 0.9199  | P > 0.05 | -20920 to 14490 |
| Renal Cell Carcinoma vs Squamous Cell Lung Carcinoma         | -9893  | 3.847   | P > 0.05 | -22940 to 3153  |
| Renal Cell Carcinoma vs Anaplastic Oligodendroglioma         | -4296  | 1.549   | P > 0.05 | -18370 to 9775  |
| Renal Cell Carcinoma vs Glioblastoma Multiforme              | -8758  | 3.277   | P > 0.05 | -22320 to 4801  |
| Hepatocellular Carcinoma vs Ovarian Carcinoma                | -2764  | 0.8304  | P > 0.05 | -19650 to 14120 |
| Hepatocellular Carcinoma vs Pancreatic Adenocarcinoma        | 2125   | 0.5467  | P > 0.05 | -17600 to 21850 |
| Hepatocellular Carcinoma vs Prostate Adenocarcinoma          | -10730 | 3.874   | P > 0.05 | -24780 to 3321  |
| Hepatocellular Carcinoma vs Prostate Adeno Metastases        | -15860 | 4.347   | P > 0.05 | -34380 to 2650  |
| Hepatocellular Carcinoma vs Nonmalignant Lung Tumor          | -1187  | 0.3053  | P > 0.05 | -20910 to 18530 |
| Hepatocellular Carcinoma vs Lung Carcinoid                   | -294.4 | 0.09599 | P > 0.05 | -15850 to 15260 |
| Hepatocellular Carcinoma vs Lung Adenocarcinoma              | -5738  | 2.089   | P > 0.05 | -19670 to 8194  |
| Hepatocellular Carcinoma vs Large Cell Lung Carcinoma        | -15300 | 3.573   | P > 0.05 | -37020 to 6420  |
| Hepatocellular Carcinoma vs Small Cell Lung Carcinoma        | -2757  | 0.7341  | P > 0.05 | -21810 to 16290 |
| Hepatocellular Carcinoma vs Squamous Cell Lung Carcinoma     | -9439  | 3.231   | P > 0.05 | -24260 to 5383  |
| Hepatocellular Carcinoma vs Anaplastic Oligodendroglioma     | -3842  | 1.239   | P > 0.05 | -19570 to 11890 |
| Hepatocellular Carcinoma vs Glioblastoma Multiforme          | -8305  | 2.758   | P > 0.05 | -23580 to 6971  |
| Ovarian Carcinoma vs Pancreatic Adenocarcinoma               | 4889   | 1.406   | P > 0.05 | -12750 to 22530 |
| Ovarian Carcinoma vs Prostate Adenocarcinoma                 | -7966  | 3.695   | P > 0.05 | -18910 to 2972  |
| Ovarian Carcinoma vs Prostate Adeno Metastases               | -13100 | 4.082   | P > 0.05 | -29380 to 3179  |
| Ovarian Carcinoma vs Nonmalignant Lung Tumor                 | 1577   | 0.4537  | P > 0.05 | -16060 to 19220 |
| Ovarian Carcinoma vs Lung Carcinoid                          | 2470   | 0.9778  | P > 0.05 | -10340 to 15280 |
| Ovarian Carcinoma vs Lung Adenocarcinoma                     | -2974  | 1.399   | P > 0.05 | -13760 to 7811  |
| Ovarian Carcinoma vs Large Cell Lung Carcinoma               | -12540 | 3.204   | P > 0.05 | -32390 to 7315  |
| Ovarian Carcinoma vs Small Cell Lung Carcinoma               | 7.257  | 0.00218 | P > 0.05 | -16880 to 16890 |
| Ovarian Carcinoma vs Squamous Cell Lung Carcinoma            | -6675  | 2.843   | P > 0.05 | -18590 to 5238  |
| Ovarian Carcinoma vs Anaplastic Oligodendroglioma            | -1078  | 0.4197  | P > 0.05 | -14100 to 11950 |
| Ovarian Carcinoma vs Glioblastoma Multiforme                 | -5540  | 2.254   | P > 0.05 | -18010 to 6932  |
| Pancreatic Adenocarcinoma vs Prostate Adenocarcinoma         | -12860 | 4.364   | P > 0.05 | -27800 to 2090  |
| Pancreatic Adenocarcinoma vs Prostate Adeno Metastases       | -17990 | 4.753   | P > 0.05 | -37190 to 1212  |
| Pancreatic Adenocarcinoma vs Nonmalignant Lung Tumor         | -3312  | 0.8249  | P > 0.05 | -23680 to 17060 |
| Pancreatic Adenocarcinoma vs Lung Carcinoid                  | -2419  | 0.7499  | P > 0.05 | -18790 to 13950 |
| Pancreatic Adenocarcinoma vs Lung Adenocarcinoma             | -7863  | 2.689   | P > 0.05 | -22700 to 6970  |
| Pancreatic Adenocarcinoma vs Large Cell Lung Carcinoma       | -17430 | 3.962   | P > 0.05 | -39740 to 4886  |
| Pancreatic Adenocarcinoma vs Small Cell Lung Carcinoma       | -4882  | 1.256   | P > 0.05 | -24600 to 14840 |
| Pancreatic Adenocarcinoma vs Squamous Cell Lung Carcinoma    | -11560 | 3.743   | P > 0.05 | -27240 to 4108  |
| Pancreatic Adenocarcinoma vs Anaplastic Oligodendroglioma    | -5967  | 1.831   | P > 0.05 | -22500 to 10570 |
| Pancreatic Adenocarcinoma vs Glioblastoma Multiforme         | -10430 | 3.286   | P > 0.05 | -26530 to 5672  |
| Prostate Adenocarcinoma vs Prostate Adeno Metastases         | -5134  | 1.956   | P > 0.05 | -18450 to 8130  |
| Prostate Adenocarcinoma vs Nonmalignant Lung Tumor           | 9544   | 3.24    | P > 0.05 | -5402 to 24490  |
| Prostate Adenocarcinoma vs Lung Adenocarcinoma               | 4992   | 4.737   | P > 0.05 | -353.8 to 10340 |
| Prostate Adenocarcinoma vs NED Lung Adenocarcinoma           | -11670 | 5.057   | P > 0.05 | -23370 to 36.54 |
| Prostate Adenocarcinoma vs Large Cell Lung Carcinoma         | -4570  | 1.325   | P > 0.05 | -22070 to 12930 |
| Prostate Adenocarcinoma vs Small Cell Lung Carcinoma         | 7974   | 2.879   | P > 0.05 | -6078 to 22030  |
| Prostate Adenocarcinoma vs Squamous Cell Lung Carcinoma      | 1291   | 0.8903  | P > 0.05 | -6068 to 8651   |
| Prostate Adenocarcinoma vs Anaplastic Oligodendroglioma      | 6889   | 3.86    | P > 0.05 | -2164 to 15940  |
| Prostate Adenocarcinoma vs Glioblastoma Multiforme           | 2426   | 1.495   | P > 0.05 | -5809 to 10660  |
| Prostate Adeno Metastases vs Nonmalignant Lung Tumor         | 14680  | 3.878   | P > 0.05 | -4524 to 33880  |
| Prostate Adeno Metastases vs Lung Adenocarcinoma             | 10130  | 3.895   | P > 0.05 | -3062 to 23320  |
| Prostate Adeno Metastases vs NED Lung Adenocarcinoma         | -6531  | 1.972   | P > 0.05 | -23330 to 10270 |
| Prostate Adeno Metastases vs Large Cell Lung Carcinoma       | 564.5  | 0.1347  | P > 0.05 | -20690 to 21820 |
| Prostate Adeno Metastases vs Small Cell Lung Carcinoma       | 13110  | 3.592   | P > 0.05 | -5407 to 31620  |
| Prostate Adeno Metastases vs Squamous Cell Lung Carcinoma    | 6426   | 2.308   | P > 0.05 | -7700 to 20550  |
| Prostate Adeno Metastases vs Anaplastic Oligodendroglioma    | 12020  | 4.046   | P > 0.05 | -3054 to 27100  |
| Prostate Adeno Metastases vs Glioblastoma Multiforme         | 7560   | 2.627   | P > 0.05 | -7040 to 22160  |
| Nonmalignant Lung Tumor vs Lung Carcinoid                    | 892.4  | 0.2766  | P > 0.05 | -15480 to 17260 |
| Nonmalignant Lung Tumor vs Lung Adenocarcinoma               | -4552  | 1.557   | P > 0.05 | -19390 to 10280 |
| Nonmalignant Lung Tumor vs Large Cell Lung Carcinoma         | -14110 | 3.209   | P > 0.05 | -36420 to 8197  |
| Nonmalignant Lung Tumor vs Small Cell Lung Carcinoma         | -1570  | 0.4039  | P > 0.05 | -21290 to 18150 |
| Nonmalignant Lung Tumor vs Squamous Cell Lung Carcinoma      | -8252  | 2.671   | P > 0.05 | -23920 to 7420  |
| Nonmalignant Lung Tumor vs Anaplastic Oligodendroglioma      | -2655  | 0.8146  | P > 0.05 | -19190 to 13880 |
| Nonmalignant Lung Tumor vs Glioblastoma Multiforme           | -7118  | 2.243   | P > 0.05 | -23220 to 8984  |
| Lung Carcinoid vs Lung Adenocarcinoma                        | -5444  | 3.23    | P > 0.05 | -14000 to 3107  |
| Lung Carcinoid vs Large Cell Lung Carcinoma                  | -15010 | 4.064   | P > 0.05 | -33740 to 3725  |
| Lung Carcinoid vs Small Cell Lung Carcinoma                  | -2463  | 0.8031  | P > 0.05 | -18020 to 13090 |
| Lung Carcinoid vs Squamous Cell Lung Carcinoma               | -9145  | 4.67    | P > 0.05 | -19080 to 790.1 |
| Lung Carcinoid vs Anaplastic Oligodendroglioma               | -3548  | 1.6     | P > 0.05 | -14790 to 7699  |
| Lung Carcinoid vs Glioblastoma Multiforme                    | -8010  | 3.834   | P > 0.05 | -18610 to 2589  |
| Lung Adenocarcinoma vs Large Cell Lung Carcinoma             | -9562  | 2.787   | P > 0.05 | -26970 to 7845  |
| Lung Adenocarcinoma vs Small Cell Lung Carcinoma             | 2981   | 1.086   | P > 0.05 | -10950 to 16910 |
| Lung Adenocarcinoma vs Squamous Cell Lung Carcinoma          | -3701  | 2.633   | P > 0.05 | -10830 to 3429  |
| Lung Adenocarcinoma vs Anaplastic Oligodendroglioma          | 1896   | 1.085   | P > 0.05 | -6970 to 10760  |
| Lung Adenocarcinoma vs Glioblastoma Multiforme               | -2566  | 1.621   | P > 0.05 | -10600 to 5464  |
| NED Lung Adenocarcinoma vs Large Cell Lung Carcinoma         | 7096   | 1.775   | P > 0.05 | -13190 to 27380 |
| Large Cell Lung Carcinoma vs Small Cell Lung Carcinoma       | 12540  | 2.929   | P > 0.05 | -9179 to 34270  |
| Large Cell Lung Carcinoma vs Squamous Cell Lung Carcinoma    | 5861   | 1.64    | P > 0.05 | -12270 to 23990 |
| Large Cell Lung Carcinoma vs Anaplastic Oligodendroglioma    | 11460  | 3.079   | P > 0.05 | -7419 to 30340  |
| Large Cell Lung Carcinoma vs Glioblastoma Multiforme         | 6996   | 1.918   | P > 0.05 | -11500 to 25500 |
| Small Cell Lung Carcinoma vs Squamous Cell Lung Carcinoma    | -6682  | 2.287   | P > 0.05 | -21500 to 8140  |
| Small Cell Lung Carcinoma vs Anaplastic Oligodendroglioma    | -1085  | 0.3499  | P > 0.05 | -16820 to 14650 |
| Small Cell Lung Carcinoma vs Glioblastoma Multiforme         | -5548  | 1.842   | P > 0.05 | -20820 to 9728  |
| Squamous Cell Lung Carcinoma vs Anaplastic Oligodendroglioma | 5597   | 2.782   | P > 0.05 | -4611 to 15810  |
| Squamous Cell Lung Carcinoma vs Glioblastoma Multiforme      | 1135   | 0.6065  | P > 0.05 | -8355 to 10620  |
| Anaplastic Oligodendroglioma vs Glioblastoma Multiforme      | -4463  | 2.086   | P > 0.05 | -15320 to 6393  |
