# Supplementary material
Source: PubMed Central journal article supplement (PMC1567908)
Supplement: pnas_0605207103_7.pdf [file pnas_0605207103_7.pdf]

**Table 5. ANOVA statistical analysis of dopa decarboxylase (DDC) in human cancers**

| Tukey's Multiple Comparison Test                            | Mean Difference | q       | P value   | 95% CI of difference |
|-------------------------------------------------------------|-----------------|---------|-----------|----------------------|
| Pheochromocytoma vs Medullary Thyroid Carcinoma             | 15990           | 8.385   | P < 0.001 | 6315 to 25660        |
| Pheochromocytoma vs Breast Adenocarcinoma                   | 31400           | 19.54   | P < 0.001 | 23250 to 39550       |
| Pheochromocytoma vs Colon Carcinoma                         | 26100           | 16.44   | P < 0.001 | 18040 to 34150       |
| Pheochromocytoma vs Renal Cell Carcinoma                    | 27650           | 14.5    | P < 0.001 | 17980 to 37320       |
| Pheochromocytoma vs Hepatocellular Carcinoma                | 30130           | 14.18   | P < 0.001 | 19350 to 40910       |
| Pheochromocytoma vs Ovarian Carcinoma                       | 32220           | 18.2    | P < 0.001 | 23230 to 41200       |
| Pheochromocytoma vs Pancreatic Adenocarcinoma               | 32150           | 14.41   | P < 0.001 | 20830 to 43460       |
| Pheochromocytoma vs Prostate Adenocarcinoma                 | 31030           | 24.73   | P < 0.001 | 24670 to 37390       |
| Pheochromocytoma vs Prostate Adeno Metastases               | 31270           | 15.33   | P < 0.001 | 20920 to 41610       |
| Pheochromocytoma vs Nonmalignant Lung Tumor                 | 32240           | 14.45   | P < 0.001 | 20920 to 43560       |
| Pheochromocytoma vs Lung Adenocarcinoma                     | 32010           | 26.01   | P < 0.001 | 25770 to 38260       |
| Pheochromocytoma vs NED Lung Adenocarcinoma                 | 23170           | 12.49   | P < 0.001 | 13760 to 32580       |
| Pheochromocytoma vs Large Cell Lung Carcinoma               | 28220           | 11.11   | P < 0.001 | 15330 to 41110       |
| Pheochromocytoma vs Small Cell Lung Carcinoma               | 25150           | 11.83   | P < 0.001 | 14360 to 35930       |
| Pheochromocytoma vs Squamous Cell Lung Carcinoma            | 32300           | 23.02   | P < 0.001 | 25180 to 39420       |
| Pheochromocytoma vs Anaplastic Oligodendroglioma            | 32360           | 20.62   | P < 0.001 | 24400 to 40320       |
| Pheochromocytoma vs Glioblastoma Multiforme                 | 32430           | 21.81   | P < 0.001 | 24890 to 39980       |
| Medullary Thyroid Carcinoma vs Breast Adenocarcinoma        | 15410           | 8.079   | P < 0.001 | 5731 to 25080        |
| Medullary Thyroid Carcinoma vs Ovarian Carcinoma            | 16230           | 7.927   | P < 0.001 | 5842 to 26610        |
| Medullary Thyroid Carcinoma vs Prostate Adenocarcinoma      | 15040           | 9.274   | P < 0.001 | 6813 to 23270        |
| Medullary Thyroid Carcinoma vs Prostate Adeno Metastases    | 15280           | 6.692   | P < 0.001 | 3696 to 26860        |
| Medullary Thyroid Carcinoma vs Lung Carcinoid               | -18680          | 10.1    | P < 0.001 | -28060 to -9296      |
| Medullary Thyroid Carcinoma vs Lung Adenocarcinoma          | 16020           | 9.994   | P < 0.001 | 7890 to 24160        |
| Medullary Thyroid Carcinoma vs Squamous Cell Lung Carcinoma | 16310           | 9.377   | P < 0.001 | 7487 to 25130        |
| Medullary Thyroid Carcinoma vs Anaplastic Oligodendroglioma | 16370           | 8.727   | P < 0.001 | 6855 to 25890        |
| Medullary Thyroid Carcinoma vs Glioblastoma Multiforme      | 16440           | 9.095   | P < 0.001 | 7271 to 25610        |
| Breast Adenocarcinoma vs Lung Carcinoid                     | -34090          | 22.16   | P < 0.001 | -41890 to -26280     |
| Colon Carcinoma vs Lung Carcinoid                           | -28790          | 18.96   | P < 0.001 | -36490 to -21090     |
| Renal Cell Carcinoma vs Lung Carcinoid                      | -30340          | 16.4    | P < 0.001 | -39720 to -20960     |
| Hepatocellular Carcinoma vs Lung Carcinoid                  | -32820          | 15.82   | P < 0.001 | -43340 to -22300     |
| Ovarian Carcinoma vs Lung Carcinoid                         | -34910          | 20.43   | P < 0.001 | -43570 to -26240     |
| Pancreatic Adenocarcinoma vs Lung Carcinoid                 | -34840          | 15.96   | P < 0.001 | -45910 to -23770     |
| Prostate Adenocarcinoma vs Lung Carcinoid                   | -33720          | 28.93   | P < 0.001 | -39630 to -27810     |
| Prostate Adeno Metastases vs Lung Carcinoid                 | -33960          | 17.1    | P < 0.001 | -44030 to -23890     |
| Nonmalignant Lung Tumor vs Lung Carcinoid                   | -34930          | 16.01   | P < 0.001 | -46000 to -23860     |
| Lung Carcinoid vs Lung Adenocarcinoma                       | 34700           | 30.44   | P < 0.001 | 28920 to 40490       |
| Lung Carcinoid vs NED Lung Adenocarcinoma                   | 25860           | 14.4    | P < 0.001 | 16750 to 34970       |
| Lung Carcinoid vs Large Cell Lung Carcinoma                 | 30910           | 12.38   | P < 0.001 | 18240 to 43580       |
| Lung Carcinoid vs Small Cell Lung Carcinoma                 | 27840           | 13.42   | P < 0.001 | 17310 to 38360       |
| Lung Carcinoid vs Squamous Cell Lung Carcinoma              | 34990           | 26.42   | P < 0.001 | 28270 to 41710       |
| Lung Carcinoid vs Anaplastic Oligodendroglioma              | 35050           | 23.38   | P < 0.001 | 27450 to 42660       |
| Lung Carcinoid vs Glioblastoma Multiforme                   | 35120           | 24.85   | P < 0.001 | 27950 to 42290       |
| Medullary Thyroid Carcinoma vs Hepatocellular Carcinoma     | 14140           | 5.989   | P < 0.01  | 2162 to 26110        |
| Medullary Thyroid Carcinoma vs Pancreatic Adenocarcinoma    | 16160           | 6.578   | P < 0.01  | 3696 to 28620        |
| Medullary Thyroid Carcinoma vs Nonmalignant Lung Tumor      | 16250           | 6.616   | P < 0.01  | 3791 to 28710        |
| Medullary Thyroid Carcinoma vs Colon Carcinoma              | 10110           | 5.345   | P < 0.05  | 513.9 to 19700       |
| Medullary Thyroid Carcinoma vs Renal Cell Carcinoma         | 11660           | 5.383   | P < 0.05  | 670.6 to 22650       |
| Lung Adenocarcinoma vs NED Lung Adenocarcinoma              | -8844           | 5.738   | P < 0.05  | -16660 to -1025      |
| NED Lung Adenocarcinoma vs Squamous Cell Lung Carcinoma     | 9131            | 5.428   | P < 0.05  | 596.8 to 17660       |
| NED Lung Adenocarcinoma vs Glioblastoma Multiforme          | 9262            | 5.284   | P < 0.05  | 369.8 to 18150       |
| Pheochromocytoma vs Lung Carcinoid                          | -2690           | 1.749   | P > 0.05  | -10490 to 5113       |
| Medullary Thyroid Carcinoma vs NED Lung Adenocarcinoma      | 7180            | 3.386   | P > 0.05  | -3578 to 17940       |
| Medullary Thyroid Carcinoma vs Large Cell Lung Carcinoma    | 12230           | 4.464   | P > 0.05  | -1670 to 26130       |
| Medullary Thyroid Carcinoma vs Small Cell Lung Carcinoma    | 9156            | 3.879   | P > 0.05  | -2820 to 21130       |
| Breast Adenocarcinoma vs Colon Carcinoma                    | -5300           | 3.339   | P > 0.05  | -13350 to 2753       |
| Breast Adenocarcinoma vs Renal Cell Carcinoma               | -3746           | 1.964   | P > 0.05  | -13420 to 5928       |
| Breast Adenocarcinoma vs Hepatocellular Carcinoma           | -1269           | 0.5969  | P > 0.05  | -12050 to 9513       |
| Breast Adenocarcinoma vs Ovarian Carcinoma                  | 819.7           | 0.963   | P > 0.05  | -8161 to 9800        |
| Breast Adenocarcinoma vs Pancreatic Adenocarcinoma          | 751.1           | 0.3367  | P > 0.05  | -10570 to 12070      |
| Breast Adenocarcinoma vs Prostate Adenocarcinoma            | -365.8          | 0.2915  | P > 0.05  | -6730 to 5999        |
| Breast Adenocarcinoma vs Prostate Adeno Metastases          | -126.2          | 0.06187 | P > 0.05  | -10470 to 10220      |
| Breast Adenocarcinoma vs Nonmalignant Lung Tumor            | 845.5           | 0.379   | P > 0.05  | -10470 to 12160      |
| Breast Adenocarcinoma vs Lung Adenocarcinoma                | 617.7           | 0.5019  | P > 0.05  | -5626 to 6862        |
| Breast Adenocarcinoma vs NED Lung Adenocarcinoma            | -8226           | 4.434   | P > 0.05  | -17640 to 1185       |
| Breast Adenocarcinoma vs Large Cell Lung Carcinoma          | -3175           | 1.25    | P > 0.05  | -16060 to 9711       |
| Breast Adenocarcinoma vs Small Cell Lung Carcinoma          | -6250           | 2.941   | P > 0.05  | -17030 to 4531       |
| Breast Adenocarcinoma vs Squamous Cell Lung Carcinoma       | 904.9           | 0.6448  | P > 0.05  | -6215 to 8025        |
| Breast Adenocarcinoma vs Anaplastic Oligodendroglioma       | 966.5           | 0.6158  | P > 0.05  | -6996 to 8929        |
| Breast Adenocarcinoma vs Glioblastoma Multiforme            | 1036            | 0.6966  | P > 0.05  | -6509 to 8581        |
| Colon Carcinoma vs Renal Cell Carcinoma                     | 1554            | 0.8217  | P > 0.05  | -8038 to 11150       |
| Colon Carcinoma vs Hepatocellular Carcinoma                 | 4031            | 1.91    | P > 0.05  | -6677 to 14740       |
| Colon Carcinoma vs Ovarian Carcinoma                        | 6119            | 3.491   | P > 0.05  | -2773 to 15010       |
| Colon Carcinoma vs Pancreatic Adenocarcinoma                | 6051            | 2.729   | P > 0.05  | -5197 to 17300       |
| Colon Carcinoma vs Prostate Adenocarcinoma                  | 4934            | 4.012   | P > 0.05  | -1305 to 11170       |
| Colon Carcinoma vs Prostate Adeno Metastases                | 5173            | 2.556   | P > 0.05  | -5094 to 15440       |
| Colon Carcinoma vs Nonmalignant Lung Tumor                  | 6145            | 2.772   | P > 0.05  | -5103 to 17390       |
| Colon Carcinoma vs Lung Adenocarcinoma                      | 5917            | 4.908   | P > 0.05  | -198.6 to 12030      |
| Colon Carcinoma vs NED Lung Adenocarcinoma                  | -2926           | 1.592   | P > 0.05  | -12250 to 6400       |
| Colon Carcinoma vs Large Cell Lung Carcinoma                | 2124            | 0.8403  | P > 0.05  | -10700 to 14950      |
| Colon Carcinoma vs Small Cell Lung Carcinoma                | -950.5          | 0.4503  | P > 0.05  | -11660 to 9757       |
| Colon Carcinoma vs Squamous Cell Lung Carcinoma             | 6204            | 4.492   | P > 0.05  | -803.2 to 13210      |
| Colon Carcinoma vs Anaplastic Oligodendroglioma             | 6266            | 4.043   | P > 0.05  | -1596 to 14130       |
| Colon Carcinoma vs Glioblastoma Multiforme                  | 6336            | 4.32    | P > 0.05  | -1104 to 13780       |
| Renal Cell Carcinoma vs Hepatocellular Carcinoma            | 2477            | 1.049   | P > 0.05  | -9498 to 14450       |
| Renal Cell Carcinoma vs Ovarian Carcinoma                   | 4566            | 2.231   | P > 0.05  | -5818 to 14950       |

|                                                             |        |         |          |                 |
|-------------------------------------------------------------|--------|---------|----------|-----------------|
| Renal Cell Carcinoma vs Pancreatic Adenocarcinoma           | 4497   | 1.831   | P > 0.05 | -7964 to 16960  |
| Renal Cell Carcinoma vs Prostate Adenocarcinoma             | 3380   | 2.084   | P > 0.05 | -4847 to 11610  |
| Renal Cell Carcinoma vs Prostate Adeno Metastases           | 3620   | 1.585   | P > 0.05 | -7964 to 15200  |
| Renal Cell Carcinoma vs Nonmalignant Lung Tumor             | 4591   | 1.869   | P > 0.05 | -7869 to 17050  |
| Renal Cell Carcinoma vs Lung Adenocarcinoma                 | 4364   | 2.722   | P > 0.05 | -3770 to 12500  |
| Renal Cell Carcinoma vs NED Lung Adenocarcinoma             | -4480  | 2.113   | P > 0.05 | -15240 to 6278  |
| Renal Cell Carcinoma vs Large Cell Lung Carcinoma           | 570.6  | 0.2082  | P > 0.05 | -13330 to 14470 |
| Renal Cell Carcinoma vs Small Cell Lung Carcinoma           | -2504  | 1.061   | P > 0.05 | -14480 to 9471  |
| Renal Cell Carcinoma vs Squamous Cell Lung Carcinoma        | 4651   | 2.674   | P > 0.05 | -4173 to 13470  |
| Renal Cell Carcinoma vs Anaplastic Oligodendrogloma         | 4712   | 2.512   | P > 0.05 | -4805 to 14230  |
| Renal Cell Carcinoma vs Glioblastoma Multiforme             | 4782   | 2.645   | P > 0.05 | -4389 to 13950  |
| Hepatocellular Carcinoma vs Ovarian Carcinoma               | 2088   | 0.9275  | P > 0.05 | -9334 to 13510  |
| Hepatocellular Carcinoma vs Pancreatic Adenocarcinoma       | 2020   | 0.7682  | P > 0.05 | -11320 to 15360 |
| Hepatocellular Carcinoma vs Prostate Adenocarcinoma         | 902.8  | 0.4819  | P > 0.05 | -8601 to 10410  |
| Hepatocellular Carcinoma vs Prostate Adeno Metastases       | 1142   | 0.4628  | P > 0.05 | -11380 to 13670 |
| Hepatocellular Carcinoma vs Nonmalignant Lung Tumor         | 2114   | 0.804   | P > 0.05 | -11220 to 15450 |
| Hepatocellular Carcinoma vs Lung Adenocarcinoma             | 1886   | 1.015   | P > 0.05 | -7537 to 11310  |
| Hepatocellular Carcinoma vs NED Lung Adenocarcinoma         | -6957  | 3       | P > 0.05 | -18720 to 4806  |
| Hepatocellular Carcinoma vs Large Cell Lung Carcinoma       | -1907  | 0.6584  | P > 0.05 | -16600 to 12790 |
| Hepatocellular Carcinoma vs Small Cell Lung Carcinoma       | -4982  | 1.961   | P > 0.05 | -17870 to 7904  |
| Hepatocellular Carcinoma vs Squamous Cell Lung Carcinoma    | 2173   | 1.1     | P > 0.05 | -7852 to 12200  |
| Hepatocellular Carcinoma vs Anaplastic Oligodendrogloma     | 2235   | 1.066   | P > 0.05 | -8405 to 12880  |
| Hepatocellular Carcinoma vs Glioblastoma Multiforme         | 2305   | 1.132   | P > 0.05 | -8027 to 12640  |
| Ovarian Carcinoma vs Pancreatic Adenocarcinoma              | -68.57 | 0.02916 | P > 0.05 | -12000 to 11860 |
| Ovarian Carcinoma vs Prostate Adenocarcinoma                | -1185  | 0.8128  | P > 0.05 | -8584 to 6213   |
| Ovarian Carcinoma vs Prostate Adeno Metastases              | -945.9 | 0.4358  | P > 0.05 | -11960 to 10070 |
| Ovarian Carcinoma vs Nonmalignant Lung Tumor                | 25.79  | 0.01096 | P > 0.05 | -11900 to 11960 |
| Ovarian Carcinoma vs Lung Adenocarcinoma                    | -202   | 0.1405  | P > 0.05 | -7497 to 7093   |
| Ovarian Carcinoma vs NED Lung Adenocarcinoma                | -9046  | 4.526   | P > 0.05 | -19180 to 1093  |
| Ovarian Carcinoma vs Large Cell Lung Carcinoma              | -3995  | 1.509   | P > 0.05 | -17420 to 9432  |
| Ovarian Carcinoma vs Small Cell Lung Carcinoma              | -7070  | 3.14    | P > 0.05 | -18490 to 4352  |
| Ovarian Carcinoma vs Squamous Cell Lung Carcinoma           | 85.16  | 0.05362 | P > 0.05 | -7972 to 8143   |
| Ovarian Carcinoma vs Anaplastic Oligodendrogloma            | 146.8  | 0.08452 | P > 0.05 | -8664 to 8958   |
| Ovarian Carcinoma vs Glioblastoma Multiforme                | 216.4  | 0.1302  | P > 0.05 | -8220 to 8652   |
| Pancreatic Adenocarcinoma vs Prostate Adenocarcinoma        | -1117  | 0.5605  | P > 0.05 | -11230 to 8992  |
| Pancreatic Adenocarcinoma vs Prostate Adeno Metastases      | -877.3 | 0.3427  | P > 0.05 | -13870 to 12110 |
| Pancreatic Adenocarcinoma vs Nonmalignant Lung Tumor        | 94.36  | 0.03475 | P > 0.05 | -13680 to 13870 |
| Pancreatic Adenocarcinoma vs Lung Adenocarcinoma            | -133.4 | 0.06746 | P > 0.05 | -10170 to 9900  |
| Pancreatic Adenocarcinoma vs NED Lung Adenocarcinoma        | -8977  | 3.716   | P > 0.05 | -21230 to 3280  |
| Pancreatic Adenocarcinoma vs Large Cell Lung Carcinoma      | -3926  | 1.32    | P > 0.05 | -19020 to 11160 |
| Pancreatic Adenocarcinoma vs Small Cell Lung Carcinoma      | -7001  | 2.663   | P > 0.05 | -20340 to 6337  |
| Pancreatic Adenocarcinoma vs Squamous Cell Lung Carcinoma   | 153.7  | 0.07357 | P > 0.05 | -10450 to 10750 |
| Pancreatic Adenocarcinoma vs Anaplastic Oligodendrogloma    | 215.4  | 0.09769 | P > 0.05 | -10970 to 11400 |
| Pancreatic Adenocarcinoma vs Glioblastoma Multiforme        | 285    | 0.1328  | P > 0.05 | -10610 to 11180 |
| Prostate Adenocarcinoma vs Prostate Adeno Metastases        | 239.6  | 0.135   | P > 0.05 | -8766 to 9245   |
| Prostate Adenocarcinoma vs Nonmalignant Lung Tumor          | 1211   | 0.6079  | P > 0.05 | -8897 to 11320  |
| Prostate Adenocarcinoma vs Lung Adenocarcinoma              | 983.5  | 1.38    | P > 0.05 | -2632 to 4599   |
| Prostate Adenocarcinoma vs NED Lung Adenocarcinoma          | -7860  | 5.038   | P > 0.05 | -15780 to 54.98 |
| Prostate Adenocarcinoma vs Large Cell Lung Carcinoma        | -2810  | 1.204   | P > 0.05 | -14650 to 9029  |
| Prostate Adenocarcinoma vs Small Cell Lung Carcinoma        | -5884  | 3.141   | P > 0.05 | -15390 to 3620  |
| Prostate Adenocarcinoma vs Squamous Cell Lung Carcinoma     | 1271   | 1.295   | P > 0.05 | -3707 to 6248   |
| Prostate Adenocarcinoma vs Anaplastic Oligodendrogloma      | 1332   | 1.104   | P > 0.05 | -4791 to 7455   |
| Prostate Adenocarcinoma vs Glioblastoma Multiforme          | 1402   | 1.277   | P > 0.05 | -4168 to 6971   |
| Prostate Adeno Metastases vs Nonmalignant Lung Tumor        | 971.7  | 0.3795  | P > 0.05 | -12020 to 13960 |
| Prostate Adeno Metastases vs Lung Adenocarcinoma            | 743.9  | 0.423   | P > 0.05 | -8177 to 9664   |
| Prostate Adeno Metastases vs NED Lung Adenocarcinoma        | -8100  | 3.616   | P > 0.05 | -19460 to 3265  |
| Prostate Adeno Metastases vs Large Cell Lung Carcinoma      | -3049  | 1.076   | P > 0.05 | -17420 to 11330 |
| Prostate Adeno Metastases vs Small Cell Lung Carcinoma      | -6124  | 2.481   | P > 0.05 | -18650 to 6399  |
| Prostate Adeno Metastases vs Squamous Cell Lung Carcinoma   | 1031   | 0.5475  | P > 0.05 | -8523 to 10590  |
| Prostate Adeno Metastases vs Anaplastic Oligodendrogloma    | 1093   | 0.5436  | P > 0.05 | -9105 to 11290  |
| Prostate Adeno Metastases vs Glioblastoma Multiforme        | 1162   | 0.5971  | P > 0.05 | -8713 to 11040  |
| Nonmalignant Lung Tumor vs Lung Adenocarcinoma              | -227.8 | 0.1152  | P > 0.05 | -10260 to 9805  |
| Nonmalignant Lung Tumor vs NED Lung Adenocarcinoma          | -9071  | 3.755   | P > 0.05 | -21330 to 3186  |
| Nonmalignant Lung Tumor vs Large Cell Lung Carcinoma        | -4021  | 1.352   | P > 0.05 | -19110 to 11070 |
| Nonmalignant Lung Tumor vs Small Cell Lung Carcinoma        | -7096  | 2.699   | P > 0.05 | -20430 to 6243  |
| Nonmalignant Lung Tumor vs Squamous Cell Lung Carcinoma     | 59.38  | 0.02842 | P > 0.05 | -10540 to 10660 |
| Nonmalignant Lung Tumor vs Anaplastic Oligodendrogloma      | 121    | 0.05489 | P > 0.05 | -11060 to 11300 |
| Nonmalignant Lung Tumor vs Glioblastoma Multiforme          | 190.6  | 0.0888  | P > 0.05 | -10700 to 11080 |
| Lung Adenocarcinoma vs Large Cell Lung Carcinoma            | -3793  | 1.634   | P > 0.05 | -15570 to 7981  |
| Lung Adenocarcinoma vs Small Cell Lung Carcinoma            | -6868  | 3.697   | P > 0.05 | -16290 to 2556  |
| Lung Adenocarcinoma vs Squamous Cell Lung Carcinoma         | 287.2  | 0.3021  | P > 0.05 | -4535 to 5109   |
| Lung Adenocarcinoma vs Anaplastic Oligodendrogloma          | 348.8  | 0.295   | P > 0.05 | -5648 to 6346   |
| Lung Adenocarcinoma vs Glioblastoma Multiforme              | 418.4  | 0.3908  | P > 0.05 | -5013 to 5850   |
| NED Lung Adenocarcinoma vs Large Cell Lung Carcinoma        | 5051   | 1.868   | P > 0.05 | -8668 to 18770  |
| NED Lung Adenocarcinoma vs Small Cell Lung Carcinoma        | 1976   | 0.8521  | P > 0.05 | -9788 to 13740  |
| NED Lung Adenocarcinoma vs Anaplastic Oligodendrogloma      | 9192   | 5.042   | P > 0.05 | -56.46 to 18440 |
| Large Cell Lung Carcinoma vs Small Cell Lung Carcinoma      | -3075  | 1.062   | P > 0.05 | -17770 to 11620 |
| Large Cell Lung Carcinoma vs Squamous Cell Lung Carcinoma   | 4080   | 1.688   | P > 0.05 | -8180 to 16340  |
| Large Cell Lung Carcinoma vs Anaplastic Oligodendrogloma    | 4142   | 1.646   | P > 0.05 | -8627 to 16910  |
| Large Cell Lung Carcinoma vs Glioblastoma Multiforme        | 4211   | 1.707   | P > 0.05 | -8301 to 16720  |
| Small Cell Lung Carcinoma vs Squamous Cell Lung Carcinoma   | 7155   | 3.621   | P > 0.05 | -2870 to 17180  |
| Small Cell Lung Carcinoma vs Anaplastic Oligodendrogloma    | 7217   | 3.441   | P > 0.05 | -3424 to 17860  |
| Small Cell Lung Carcinoma vs Glioblastoma Multiforme        | 7286   | 3.578   | P > 0.05 | -3046 to 17620  |
| Squamous Cell Lung Carcinoma vs Anaplastic Oligodendrogloma | 61.63  | 0.04528 | P > 0.05 | -6843 to 6966   |
| Squamous Cell Lung Carcinoma vs Glioblastoma Multiforme     | 131.3  | 0.1037  | P > 0.05 | -6288 to 6550   |
| Anaplastic Oligodendrogloma vs Glioblastoma Multiforme      | 69.63  | 0.04811 | P > 0.05 | -7273 to 7412   |
